# Supplementary material for: Characterization of SARS-CoV-2 genetic structure and infection clusters in a large German city based on integrated genomic surveillance, outbreak analysis, and contact tracing
Source: bioRxiv or medRxiv preprint supplement (doi:10.1101/2021.02.13.21251678), 2021-02-18

## GISAID Neighbourhood Search for Surveillance Samples

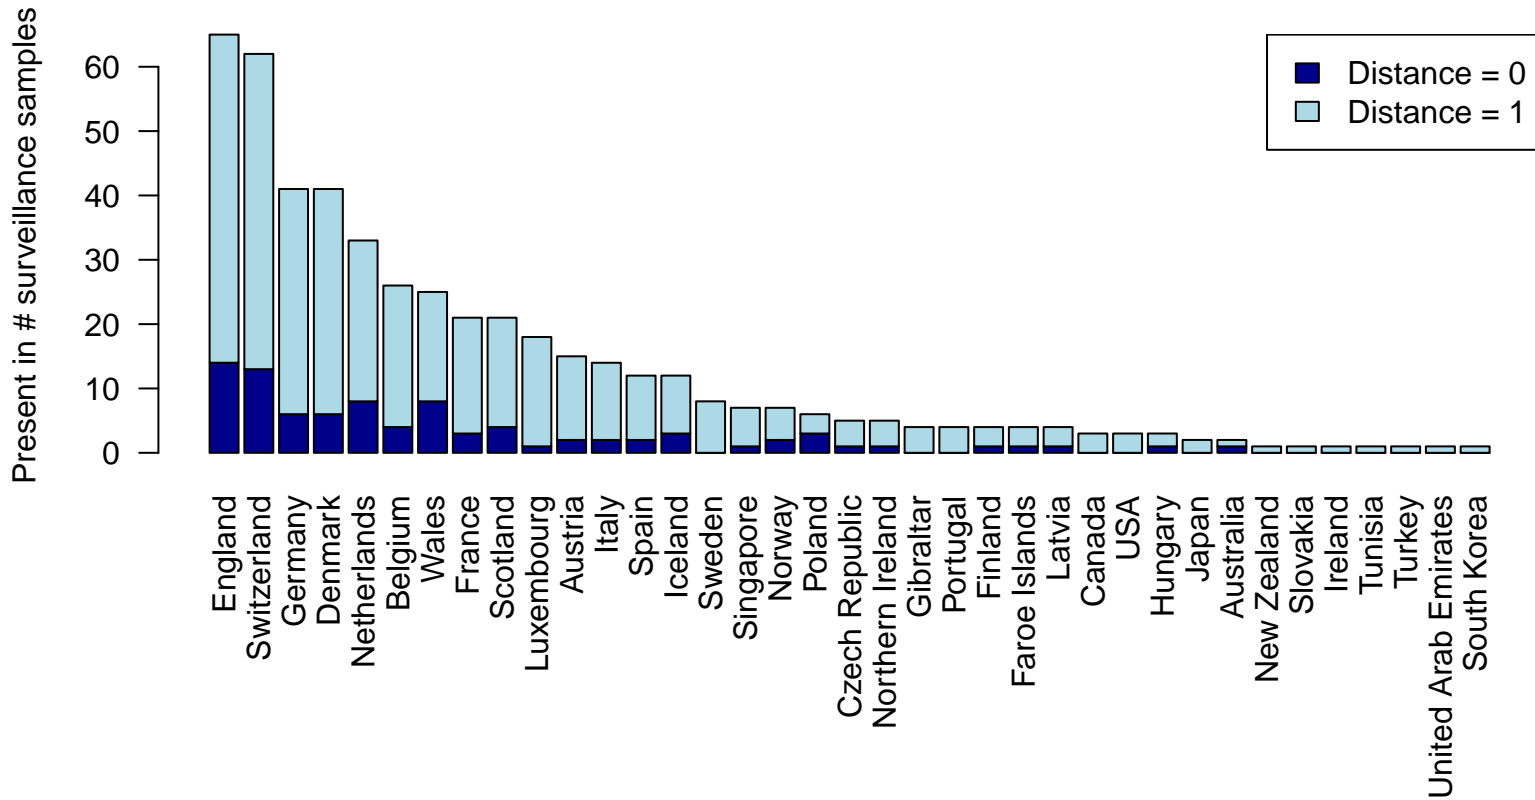

Supplement: Supplementary file [file media-1.pdf]
